# Supplementary material for: Innovative aminoglutethimide co-crystals: synthesis, characterization, and insights into molecular interactions
Source: Royal Society of Chemistry journal article supplement (doi:10.1039/d4ce01171f), 2025-01-01
Supplement: d4ce01171f1.pdf [file d4ce01171f1.pdf]

## Supporting Information

# Innovative Aminoglutethimide Co-crystals: Synthesis, Characterization, and Insights into Molecular Interactions

Ying Qi<sup>1</sup>, Yang Liu<sup>1</sup>, Xia Li<sup>1</sup>, Juan Xu<sup>2</sup>, Yingxia Tan<sup>3</sup> and Qi Zhang<sup>1,\*</sup>

<sup>1</sup> School of Chemistry and Chemical Engineering, Beijing Institute of Technology, Beijing 100081, China

<sup>2</sup> NHC Key Laboratory of Reproductive Health Engineering Technology Research, National Research Institute for Family Planning, Beijing 100081, China; xujuan@nrifp.org.cn

<sup>3</sup> Department of Stem Cell and Regenerative Medicine, Institute of Health Service and Transfusion Medicine, Beijing, 100000, China; tanhu333@126.com

\* Correspondence: zhangqi@bit.edu.cn

## *Supporting Information*

Table S1. Geometric parameters of hydrogen bonds for co-crystals (Å, °).

| compound | D-H...A     | d(D-H)/ Å | d(H...A)/ Å | d(D...A)/ Å | ∠(D-H...A)/ ° |
|----------|-------------|-----------|-------------|-------------|---------------|
| AG-DNBA  | N3-H3A...O7 | 0.860     | 2.348       | 2.950       | 127.450       |
|          | N3-H3B...O4 | 0.860     | 2.653       | 3.375       | 142.430       |
|          | N3-H3B...O8 | 0.859     | 2.654       | 3.306       | 133.670       |
|          | N3-H3B...O3 | 0.860     | 2.271       | 2.699       | 110.770       |
|          | N4-H4A...O3 | 0.860     | 2.158       | 2.990       | 162.800       |
|          | O4-H4...N3  | 0.820     | 2.409       | 2.758       | 106.640       |
| AG-m-TA  | O1-H1...O4  | 0.820     | 3.516       | 3.910       | 113.040       |

|                 |               |       |       |       |         |
|-----------------|---------------|-------|-------|-------|---------|
|                 | N1-H1A...O1   | 0.860 | 2.200 | 2.994 | 153.610 |
|                 | N2-H2A...O2   | 0.859 | 2.415 | 3.918 | 104.320 |
|                 | N2-H2B...N2   | 0.860 | 3.201 | 3.743 | 123.360 |
|                 | N2-H2B...O2   | 0.860 | 2.003 | 2.850 | 168.020 |
|                 | N2-H2B...O3   | 0.860 | 2.590 | 2.982 | 108.880 |
|                 | N2-H10...O10  | 0.820 | 1.980 | 2.736 | 152.100 |
|                 | C31-H31...O2  | 0.930 | 2.640 | 3.213 | 120.500 |
|                 | C31-H31...O2  | 0.930 | 2.130 | 3.028 | 162.900 |
|                 | N3-H3...O3    | 0.860 | 2.080 | 2.936 | 179.100 |
| <b>AG-m-NBA</b> | N1-H1A...O15  | 0.860 | 1.930 | 2.762 | 163.000 |
|                 | N1-H1B...O9   | 0.860 | 2.230 | 2.765 | 119.900 |
|                 | N2-H2B...O5   | 0.860 | 2.000 | 2.834 | 161.900 |
|                 | C1-H1...O5    | 0.930 | 2.600 | 3.529 | 173.400 |
|                 | C32-H32B...O2 | 0.970 | 2.480 | 3.294 | 141.000 |
|                 | C38-H38...O9  | 0.930 | 2.490 | 3.387 | 162.700 |

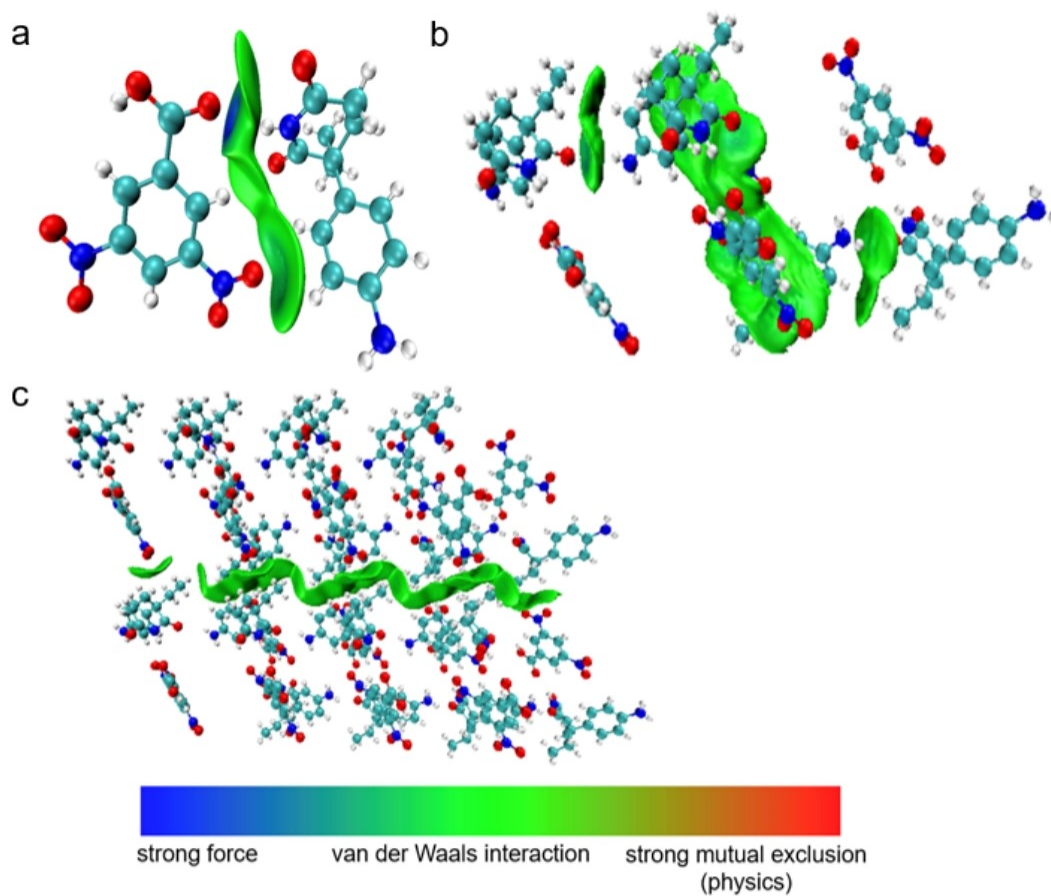

Figure S1. The  $\text{sign}(\lambda_2)\rho$  colored isosurfaces of  $\delta g_{\text{inter}} = 0.0004$  a.u. corresponding to IGMH analysis of (a) asymmetric structural unit (b) one-dimensional chain structure and (c) two-dimensional plane structure of AG-DNBA co-crystal.

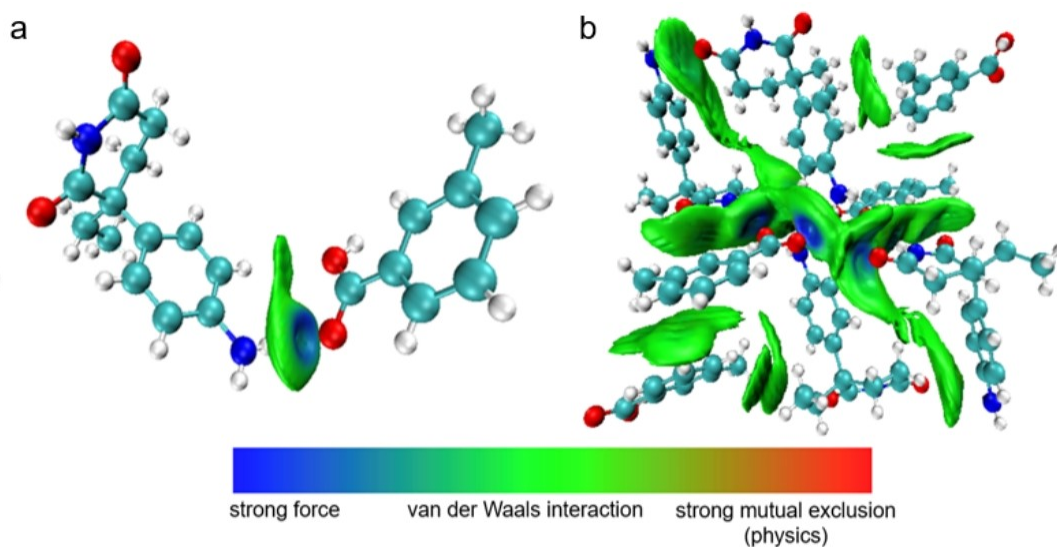

Figure S2. The  $\text{sign}(\lambda_2)\rho$  colored isosurfaces of  $\delta g_{\text{inter}} = 0.0004$  a.u. corresponding to IGMH analysis of (a) asymmetric structural unit (b) octamer structure of AG-m-TA co-crystal.

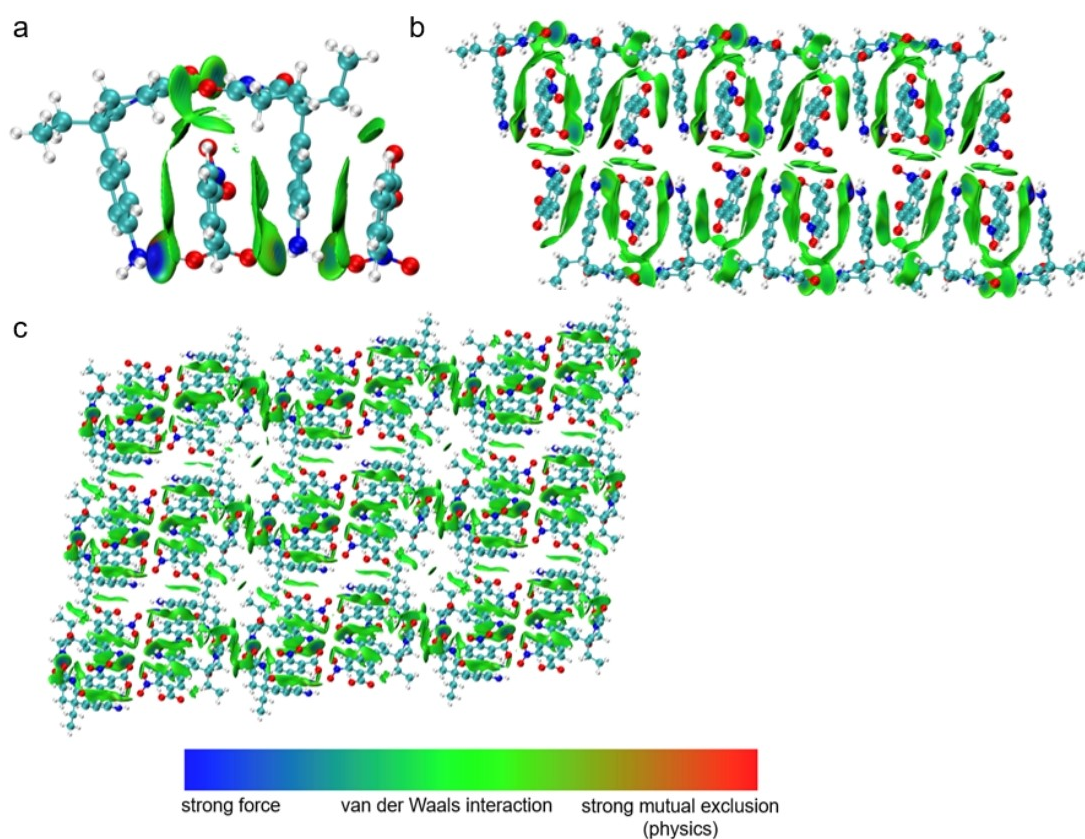

Figure S3. The  $\text{sign}(\lambda_2)\rho$  colored isosurfaces of  $\delta g_{\text{inter}} = 0.003$  a.u. corresponding to IGMH analysis of (a) asymmetric structural unit (b) one-dimensional chain structure and (c) two-dimensional plane structure of AG-m-NBA co-crystal.
